# Supplementary material for: Increased and Imbalanced dNTP Pools Symmetrically Promote Both Leading and Lagging Strand Replication Infidelity
Source: PLoS Genet. 2014 Dec 4;10(12):e1004846. doi: 10.1371/journal.pgen.1004846 (PMC4256292; doi:10.1371/journal.pgen.1004846)
Supplement: Figure S2 — Full CAN1 mutation spectrum of msh2Δ strain, showing individual mutations. (PDF) [file pgen.1004846.s002.pdf]

▼ single base addition

Δ single base deletion

*msh2Δ*

n=164

1 ATGACAAATT <sup>Δ</sup>CAAAAAGAAGA CGCCGACATA GAGGAGAAGC ATATGTACAA TGAGCCGGTC ACAACCCCTCT TTCACGACGT TGAAGCTTCA <sup>T</sup>CAAACACACC

101 ACAGACGTGG <sup>A</sup>GTCAATACCA TTGAAAGATG AGAAAAGTAA AGAATTGTAT CCATTGCGCT CTTTCCCGAC GAGAGTAAAT GGCGAGGATA <sup>Δ</sup>CGTTCTCTAT

201 GGAGGATGGC ATAGGTGATG AAGATGAAGG <sup>T</sup>AGAAGTACAG AACGCTGAAG TGAAGAGAGA <sup>G</sup>GCTTAAGCAA <sup>T</sup>AGACATATTG GTATGATTGC CCTTGGTGGT <sup>A</sup>

301 ACTATTGGTA <sup>G</sup><sup>T</sup><sup>A</sup><sup>T</sup><sup>Δ</sup>CAGGTCTTTT CATTGGTTTA TCCACACCTC TGACCAACGC <sup>A</sup>CGGCCAGTG GGCGCTCTTA <sup>A</sup>TATCATATTT ATTTATGGGT <sup>A</sup>TCTTTGGCAT

401 <sup>G</sup>ATTCTGTCAC GCAGTCCTTG GGTGAAATGG CTACATTTCAT <sup>Δ</sup>CCCTGTTACA TCCTCTTTCA CAGTTTTTCTC ACAAAGATTC CTTTCTCCAG <sup>AAA</sup>CATTTGGTGC

501 GGCCAATGGT <sup>AA</sup>TACATGTATT <sup>C</sup>GGTTTTCTTG GGCAATCACT <sup>Δ</sup>TTTGGCCCTGG AACTTAGTGT AGTTGGCCAA GTCATTCAAT TTTGGACGTA CAAAGTTCCA

601 CTGGCGGCAT GGATTAGTAT <sup>Δ</sup>TTTTTGGGTA ATTATCACAA TAATGAACCTT <sup>A</sup>GTCCCTGTG AAATATTACG <sup>G</sup><sup>A</sup>GTGAATTCGA <sup>T</sup>GTCTGGGTC GCTTCCATCA <sup>G</sup>

701 <sup>Δ</sup>AAGTTTTAGC CATTATCGGG <sup>Δ</sup>TTTCTAATAT <sup>Δ</sup>ACTGTTTTTG TATGGTTTGT GGTGCTGGGG <sup>Δ</sup>TTACCGGCCC AGTTGGATTG <sup>T</sup>CGTTATTGGA <sup>A</sup><sup>T</sup>GAAACCCAGG

801 TGCCTGGGGT <sup>A</sup>CCAGGTATAA TATCTAAGGA TAAAAACGAA GGGAGGTTCT TAGGTTGGGT <sup>Δ</sup>TTCCTCTTTG ATTAACGCTG CCTTCACATT <sup>G</sup>TCAAGGTACT <sup>T</sup>

901 <sup>A</sup>GAAC TAGTTG GTATCACTGC TGGTGAAGCT GCAAACCCCA <sup>A</sup>GAAAATCCGT TCCAAGAGCC ATCAAAAAAG <sup>Δ</sup>TTGTTTCCG <sup>AAA</sup>TATCTTAACC TTCTACATTG

1001 GCTCTCTATT <sup>G</sup>ATTCATTGGA CTTTTAGTTC CATAACAATGA CCCTAAACTA ACACAATCTA CTTCTACGT TTCTACTTCT CCCTTTATTA TTGCTATTGA <sup>T</sup>

1101 GAACTCTGGT <sup>Δ</sup>ACAAAGGTTT <sup>Δ</sup>TGCCACATAT CTTCAACGCT GTTATCTTAA CAACCATTAT <sup>T</sup>TTCTGCCGCA AATTCAAATA TTTACGTGGT <sup>Δ</sup>TTCCCGTATT

1201 TTATTTGGTC <sup>C</sup>TATCAAAGAA CAAGTTGGCT CCTAAATTCC TGTCAAGGAC CACCAAAGGT <sup>Δ</sup>GGTGTTCCAT <sup>A</sup>ACATTGCAGT <sup>T</sup>TTTCGTTACT GCTGCATTTG <sup>Δ</sup>8 bp

1301 GCGCTTTTGGC TTACATGGAG ACATCTACTG GTGGTGACAA AGTTTTTCGAA <sup>A</sup>TGGCTATTAA ATATCACTGG <sup>T</sup>TGTTGCAGGC <sup>T</sup><sup>A</sup>TTTTTTGCAT <sup>Δ</sup>GGTTATTTAT

1401 CTCAATCTCG CACATCAGAT TTATGCAAGC TTTGAAATAC <sup>G</sup>CGTGGCATCT CTCGTGACGA GTTACCATTT AAAGCTAAAT TAATGCCCGG <sup>Δ</sup>CTTGGCTTAT

1501 TATGCGGCCA CATTTATGAC GATCATTATC ATTATTCAAG GTTTCACGGC TTTTGCACCA AAATTCAATG GTGTTAGCTT TGCTGCCGCC TATATCTCTA

1601 <sup>Δ</sup>TTTTCTGTG CTTAGCTGTT TGGATCTTAT TTCAATGCAT ATTCAGATGC AGATTTATTT GGAAGATTGG AGATGTCGAC ATCGATTCCG ATAGAAGAGA

1701 CATTGAGGCA ATTGATGGG AAGATCATGA ACCAAAGACT TTTTGGGACA AATTTTGGAA TGTTGTAGCA TAG
