# Supplementary material for: Increased and Imbalanced dNTP Pools Symmetrically Promote Both Leading and Lagging Strand Replication Infidelity
Source: PubMed Central journal article supplement (PMC4256292; doi:10.1371/journal.pgen.1004846), 2014-12-04
Supplement: pgen.1004846.s001.pdf [file pgen.1004846.s001.pdf]

*rnr1-Y285A CAN1-OR2*

n = 170

▼ single base addition

Δ single base deletion

1 ATGACAAATT CAAAAGAAGA CGCCGACATA GAGGAGAAGC ATATGTACAA TGAGCCGGTC ACAACCCCTCT TTCACGACGT TGAAGCTTCA CAAACACACC  
T T G

101 ACAGACGTGG GTCAATACCA TTGAAAGATG AGAAAAGTAA AGAATTGTAT CCATTGCGCT CTTTCCCGAC GAGAGTAAAT GGCGAGGATA CGTTCTCTAT  
ΔΔΔ A TTT

201 GGAGGATGGC ATAGGTGATG AAGATGAAGG AGAAGTACAG AACGCTGAAG TGAAGAGAGA GCTTAAGCAA AGACATATTG GTATGATTGC CTTGGTGGT  
T C TTT

301 ACTATTGGTA CAGGTCTTTT CATTGGTTTA TCCACACCTC TGACCAACGC CGGCCAGTG GGCGCTCTTA TATCATATTT ATTTATGGGT TCTTTGGCAT  
T Δ A AAA TTTTT A ΔΔΔ Δ

401 ATTCTGTCAC GCAGTCCTTG GGTGAAATGG CTACATTCAT CCCTGTTACA TCCTCTTTCA CAGTTTTTCTC ACAAAGATTC CTTTCTCCAG CATTTGGTGC  
Δ A T ΔΔΔΔΔΔΔ

501 GGCCAATGGT TACATGTATT GGTTTTCTTG GGCAATCACT TTTGCCCTGG AACTTAGTGT AGTTGGCCAA GTCATTCAAT TTTGGACGTA CAAAGTTCCA  
G ΔA A TTT

601 CTGGCGGCAT GGATTAGTAT TTTTTGGGTA ATTATCACAA TAATGAACCT GTTCCCTGTC AAATATTACG GTGAATTCGA GTTCTGGGTC GCTTCCATCA  
Δ A AAA G T A A Δ

701 AAGTTTTAGC CATTATCGGG TTTCTAATAT ACTGTTTTTG TATGGTTTGT GGTGCTGGGG TTACCGGCC AGTTGGATTG CGTTATTGGA GAAACCCAGG  
Δ ΔΔ ΔΔΔΔΔΔΔΔ

801 TGCCTGGGGT CCAGGTATAA TATCTAAGGA TAAAAACGAA GGGAGGTTCT TAGGTTGGGT TTCCTCTTTG ATTAACGCTG CCTTCACATT TCAAGGTACT  
A ΔΔΔΔΔΔΔ ΔΔΔΔΔΔΔΔΔΔΔ

901 GAACTAGTTG GTATCACTGC TGGTGAAGCT GCAAACCCCA GAAAATCCGT TCCAAGAGCC ATCAAAAAAG TTGTTTTCCG TATCTTAACC TTCTACATTG  
T T TT TTT Δ

1001 GCTCTCTATT ATTCATTGGA CTTTTAGTTC CATAACAATGA CCCTAAACTA ACACAATCTA CTTCTACGT TTCTACTTCT CCCTTTATTA TTGCTATTGA  
G Δ

1101 GAACTCTGGT ACAAAGGTTT TGCCACATAT CTTCAACGCT GTTATCTTAA CAACCATTAT TTCTGCCGCA AATTCAAATA TTTACGTTGG TTCCCGTATT  
A Δ

1201 TTATTTGGTC TATCAAAGAA CAAGTTGGCT CCTAAATTC TGTC AAGGAC CACCAAAGGT GGTGTTCCAT ACATTGCAGT TTTGTTACT GCTGCATTG  
T T TTT

1301 GCGCTTTGGC TTACATGGAG ACATCTACTG GTGGTGACAA AGTTTTTCGAA TGGCTATTAA ATATCACTGG TGTTCAGGC TTTTTTGCAT GGTATTATAT  
A AAA A A A

1401 CTCAATCTCG CACATCAGAT TTATGCAAGC TTTGAAATAC CGTGGCATCT CTCGTGACGA GTTACCATTT AAAGCTAAAT TAATGCCCGG CTTGGCTTAT  
C A AA

1501 TATGCGGCCA CATTTATGAC GATCATTATC ATTATTCAAG GTTTCACGGC TTTTGCACCA AAATTCAATG GTGTTAGCTT TGCTGCCGCC TATATCTCTA

1601 TTTTCTGTT CTTAGCTGTT TGGATCTTAT TTCAATGCAT ATTCAGATGC AGATTTATTT GGAAGATTGG AGATGTGCAC ATCGATTCCG ATAGAAGAGA

1701 CATTGAGGCA ATTGATGGG AAGATCATGA ACCAAAGACT TTTTGGGACA AATTTTGGAA TGTTGTAGCA TAG
