# Supplementary material for: Increased and Imbalanced dNTP Pools Symmetrically Promote Both Leading and Lagging Strand Replication Infidelity
Source: PubMed Central journal article supplement (PMC4256292; doi:10.1371/journal.pgen.1004846), 2014-12-04
Supplement: pgen.1004846.s003.pdf [file pgen.1004846.s003.pdf]

▼ single base addition

*rnr1-Y285A msh2Δ*

n = 259

Δ single base deletion

1 ATGACAAATT CAAAAGAAGA CGCCGACATA GAGGAGAAGC ATATGTACAA TGAGCCGGTC ACA<sup>C</sup>ACCCTCT TTCACGACGT TGAAGCTTCA CAAACACACC

101 ACAGACGTGG GT<sup>G</sup>CAATACCA TTGAAAGATG AGAAAAGTAA A<sup>T</sup>GAATTGTAT CCATTGCGCT CTTTCCCGAC GAGAGTAAAT GGCGAGGATA CGTTCTCTAT

201 GGAGGATGGC ATAGGTGATG AAGATGAAGG AGAAGTACAG AACGCTGAAG TGAAGAGAGA G<sup>AG</sup>CTTAAGCAA AGACATATTG T<sup>T</sup>TATGATTGC CCTTGGTGGT<sup>TT</sup>

301 ACTATTGGTA CAGGTCTTTT<sup>TTTTTTT AAAA</sup> CATTGGTTTA TCCACACCTC TGACCAACGC C<sup>T</sup>GGCCAGTG GGCGCTCTTA TATCATATTT ATTTATGGGT<sup>A</sup> TCTTTGGCAT

401 ATTCTGTCAC GCAGTCCTTG GGTGAAATGG CTACATTCAT CC<sup>A</sup>TGTTACA TCCTCTTTCA CAG<sup>T</sup>TTTTCTC ACAAAGATTC CTTTCTCCAG CATT<sup>A</sup>TTGGTGC

501 GGCCAATGGT TACATGTATT<sup>AAAA</sup> GGT<sup>AAAA</sup>TTTCTTG GGCAATCACT<sup>A</sup> TTTGCCCTGG<sup>T</sup> AACTTAGTGT AGTTGGCCAA GTCATTCAAT TTTGGACGTA<sup>A</sup> CAAAGTTCCA

601 CTGGCGGCAT GGATTAGTAT<sup>AA</sup> TTTTTGGGTA ATTATCACAA TAATGAAC<sup>A</sup>TT GTTCCCTGTC AAATATTACG<sup>A</sup> GTGAATTCGA<sup>T</sup> GTTCTGGGTC<sup>Δ</sup> GCTTCCATCA

701 AAGTTTTAGC CATTATCGGG TTTCTAATAT A<sup>Δ</sup>CTGTTTTTG TATGGTTTGT GGTGCTGGGG<sup>Δ</sup> TTACCGGCC AGTTGGATT<sup>C</sup>C CGTTATTGGA<sup>CA</sup> GAAACCCAGG<sup>Δ</sup>

801 TGCCTGGGGT CCAGGTATAA TATCTAAGGA T<sup>Δ</sup>AAAAACGAA GGGAGGTTCT TAGGTTGGGT<sup>Δ</sup> TTCCTCTTTG ATTAACGCTG CCTTCACATT<sup>A</sup> TCAAGGTACT

901 GAACTAGTTG T<sup>T</sup>GATCACTGC<sup>A</sup> TGGTGAAGCT G<sup>Δ</sup>CAACCCTCA G<sup>Δ</sup>AAAATCCGT TCCAAGAGCC<sup>AA</sup> ATC<sup>Δ</sup>AAAAAAG<sup>Δ</sup> TTGT<sup>Δ</sup>TTTCCG<sup>A</sup> TATCTTAACC TTCTACATTG

1001 GCTCTCTATT ATT<sup>T</sup>CATTGGA CTTTTAGTTC CATAACAATGA CCCTAAACTA ACACAATCTA CTTCCCTACGT TTCTACTTCT CCCTTTATTA TTGCTATTG<sup>T</sup>A

1101 GAACTCTGGT ACAAAGGTTT<sup>Δ</sup> TGCCACATAT CTTCAACGCT GTTATCTTAA CAACCATTAT TTCTGCCGCA AATTCAAATA TTTACGTTGG TTCCCCTATT<sup>A</sup>

1201 TTATTTGGTC C<sup>C</sup>TATCAAAGAA CAAGTTGGCT CCTAAATTC TGTC AAGGAC CACCAAAGGT GGTGTTCCAT ACATTGCAGT<sup>TTT</sup> TTTTCGTTACT<sup>T</sup> GCTGCATTG<sup>Δ</sup>

1301 GCGCTTTGGC TT<sup>G</sup>ACATGGAG<sup>T</sup> ACATCTACTG GTGGTGACAA AGTTTTTCGAA TGGCTATTAA ATATCACTGG TGTTGCAGGC<sup>TTT</sup> TTTTTCGCAT<sup>TT</sup> GGT<sup>TT</sup>TATTTAT<sup>TTT</sup>

1401 CTCAATCTCG CACATCAGAT TTATGCAAGC TTTGAAATAC<sup>AAA</sup> CGTGGCATCT CTCGTGACGA GTTACCATTT AAAGCTAAAT TAATG<sup>Δ</sup>CCCGG CTTGGCTTAT

1501 TATGCGGCCA CATT<sup>A</sup>TATGAC GATCATTATC ATTATTCAAG G<sup>Δ</sup>TTTCACGGC TTTTGCACCA<sup>Δ</sup> AAATTCAATG GTGTTAGCTT TGCTGCCGCC TATATCTCTA

1601 TTTTCTCTGTT CTTAGCTGTT<sup>Δ</sup> TGGATCTTAT TTCAATGCAT ATT<sup>A</sup>CAGATGC AGATTTATTT GGAAGATTGG AGATGTGCAC ATCGATTCCG ATAGAAGAGA

1701 CATTGAGGCA ATTGTATGGG AAGATCATGA ACCAAAGACT TTTTGGGACA AATTTTGGAA TGTTGTAGCA TAG

Δ47 bp
