# Supplementary material for: Increased and Imbalanced dNTP Pools Symmetrically Promote Both Leading and Lagging Strand Replication Infidelity
Source: PubMed Central journal article supplement (PMC4256292; doi:10.1371/journal.pgen.1004846), 2014-12-04
Supplement: pgen.1004846.s005.pdf [file pgen.1004846.s005.pdf]

|               |                       |                      |                      |                          |
|---------------|-----------------------|----------------------|----------------------|--------------------------|
| Strain        | WT                    | <i>msh2</i> Δ        | <i>rnr1-Y285A</i>    | <i>rnr1-Y285A msh2</i> Δ |
| Rates         | 4.2 x10 <sup>-7</sup> | 67 x10 <sup>-7</sup> | 57 x10 <sup>-7</sup> | 2236 x10 <sup>-7</sup>   |
| # Individuals | 94                    | 164                  | 173                  | 259                      |

| Classification <sup>a</sup>                 | Hotspot   | Mutation | Rate x 10 <sup>-8</sup> |               |                   |                          | MMR cf <sup>b</sup> |                   |
|---------------------------------------------|-----------|----------|-------------------------|---------------|-------------------|--------------------------|---------------------|-------------------|
|                                             |           |          | WT                      | Δ <i>msh2</i> | <i>rnr1-Y285A</i> | <i>rnr1-Y285A msh2</i> Δ | WT                  | <i>rnr1-Y285A</i> |
| 1                                           | 540-543   | ΔT       | < 0.45 <sup>c</sup>     | 28            | < 3.0             | 86 <sup>d</sup>          | >62                 | >29               |
|                                             | 620-625   | ΔT       | 0,45                    | 49            | < 3.0             | 1810                     | 110                 | >600              |
|                                             |           | +T       | 0,90                    | 20            | < 3.0             | 600                      | 22                  | >200              |
|                                             |           | Total    | 1,3                     | 69            | < 3.0             | 2410                     | 53                  | >800              |
|                                             | 735-739   | ΔT       | < 0.45                  | 20            | 3,0               | 520                      | >44                 | 170               |
|                                             |           | +T       | < 0.45                  | 4,1           | < 3.0             | 86 <sup>d</sup>          | >9                  | >29               |
|                                             |           | Total    | < 0.45                  | 24            | 3,0               | 600                      | >53                 | 200               |
|                                             | 964-969   | ΔA       | < 0.45                  | 77            | < 3.0             | 950                      | >170                | >320              |
|                                             |           | +A       | < 0.45                  | 8,2           | < 3.0             | 86 <sup>d</sup>          | >18                 | >29               |
|                                             |           | Total    | < 0.45                  | 86            | < 3.0             | 1040                     | >190                | >350              |
|                                             | 1118-1121 | ΔT       | < 0.45                  | 8,2           | < 3.0             | 1120                     | >18                 | >370              |
|                                             | 1381-1386 | ΔT       | < 0.45                  | 49            | < 3.0             | 690                      | >150                | >230              |
|                                             |           | +T       | < 0.45                  | 12            | < 3.0             | 260                      | >27                 | >87               |
|                                             | Total     | < 0.45   | 61                      | < 3.0         | 950               | >140                     | >320                |                   |
| 1392                                        | G → A     | < 0.45   | 8,2                     | < 3.0         | 690               | >18                      | >230                |                   |
|                                             | G → T     | < 0.45   | < 4.1                   | < 3.0         | 86 <sup>d</sup>   | >9                       | >29                 |                   |
|                                             | Total     | < 0.45   | 8.2                     | < 3.0         | 780               | >18                      | >260                |                   |
| 2                                           | 109-111   | ΔG       | < 0.45                  | < 4.1         | 13                | < 86                     | >9                  | >7                |
|                                             | 142       | G → T    | < 0.45                  | < 4.1         | 13                | 86 <sup>d</sup>          | >9                  | 7                 |
|                                             | 522       | G → A    | < 0.45                  | < 4.1         | 6,6               | 690                      | >9                  | 100               |
|                                             | 648       | C → A    | < 0.45                  | < 4.1         | 20                | 340                      | >9                  | 17                |
|                                             | 718-720   | ΔG       | < 0.45                  | < 4.1         | 20                | < 86                     | >9                  | >4                |
|                                             | 806-809   | ΔG       | < 0.45                  | < 4.1         | 46                | 520                      | >9                  | 11                |
|                                             | 1279      | G → T    | 0,45                    | 4,1           | 6,0               | 600                      | 9                   | 100               |
|                                             | 1440      | C → A    | < 0.45                  | < 4.1         | 13                | 340                      | >9                  | 26                |
| 2 or 3<br>Note <i>msh2</i> Δ not<br>>10x wt | 314       | G → A    | 0,9                     | 4,1           | 9,9               | 770                      | 5                   | 78                |
|                                             |           | G → T    | < 0.45                  | 4,1           | 13                | < 86                     | >9                  | >29               |
|                                             |           | Total    | 0,9                     | 8,2           | 23                | 770                      | 9                   | 33                |
| 3                                           | 313       | G → T    | < 0.45                  | 8,2           | 9,9               | 1380                     | >18                 | 140               |
|                                             | 757-760   | ΔG       | < 0.45                  | 20            | 16                | 170                      | >44                 | 11                |
|                                             | 795-797   | ΔC       | < 0.45                  | 8,2           | 89                | 690                      | >18                 | 8                 |
|                                             | 857-859   | ΔG       | < 0.45                  | 12            | 120               | 600                      | >27                 | 5                 |
|                                             | 1379      | G → T    | < 0.45                  | 4,1           | 6,0               | 430                      | >9                  | 72                |
|                                             |           | G → A    | < 0.45                  | 4,1           | < 3.0             | 170                      | >9                  | >57               |
|                                             | Total     | < 0.45   | 8,2                     | 6,0           | 600               | >18                      | 100                 |                   |
